# Supplementary material
Source: HighWire-hosted journal article supplement (https://gut.bmj.com/content/72/10/1996)
Supplement: inline-supplementary-material-1 [file inline-supplementary-material-1.pdf]

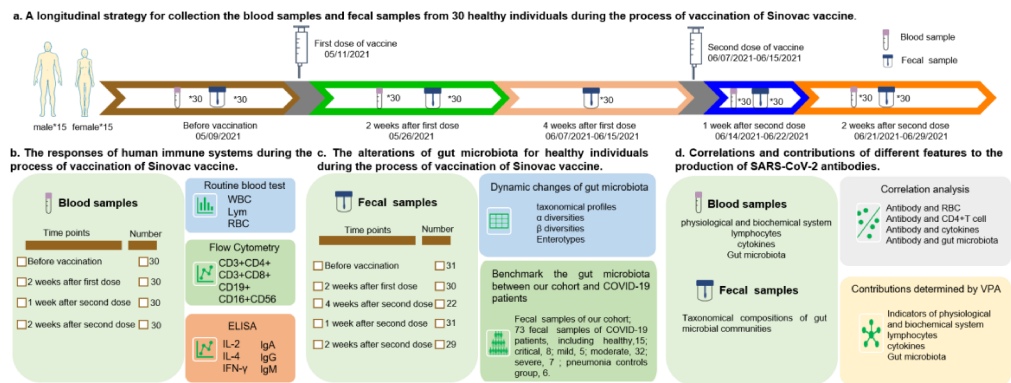

**Supplementary Figure S1. A longitudinal sampling strategy for the collection of blood and fecal samples from 30 healthy individuals at different points during the process of SARS-CoV-2 vaccination was used to explore the dynamic patterns of immune systems, the gut microbiota, and the production of antibodies and their interactions. a:** Longitudinal strategy for collecting blood and fecal samples from 30 healthy individuals during the process of vaccination with the Sinovac vaccine. **b:** Responses of human immune systems during the process of vaccination with the Sinovac vaccine. **c:** Alterations in the gut microbiota of healthy individuals during the process of vaccination with the Sinovac vaccine. **d:** Correlations and contributions of different features to the production of SARS-CoV-2 antibodies.
